# Supplementary material
Source: Springer Nature journal article supplement (https://www.springerprofessional.de/resource/supplementary/13638_2011_296_MOESM17_ESM.pdf/11897508)
Supplement: MOESM17 [file 11897508]

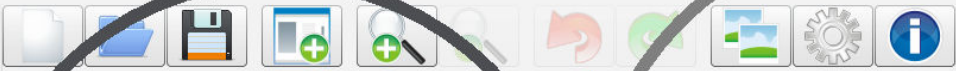

1. Configure floor plan, networks and requirements    2. Run coverage tools

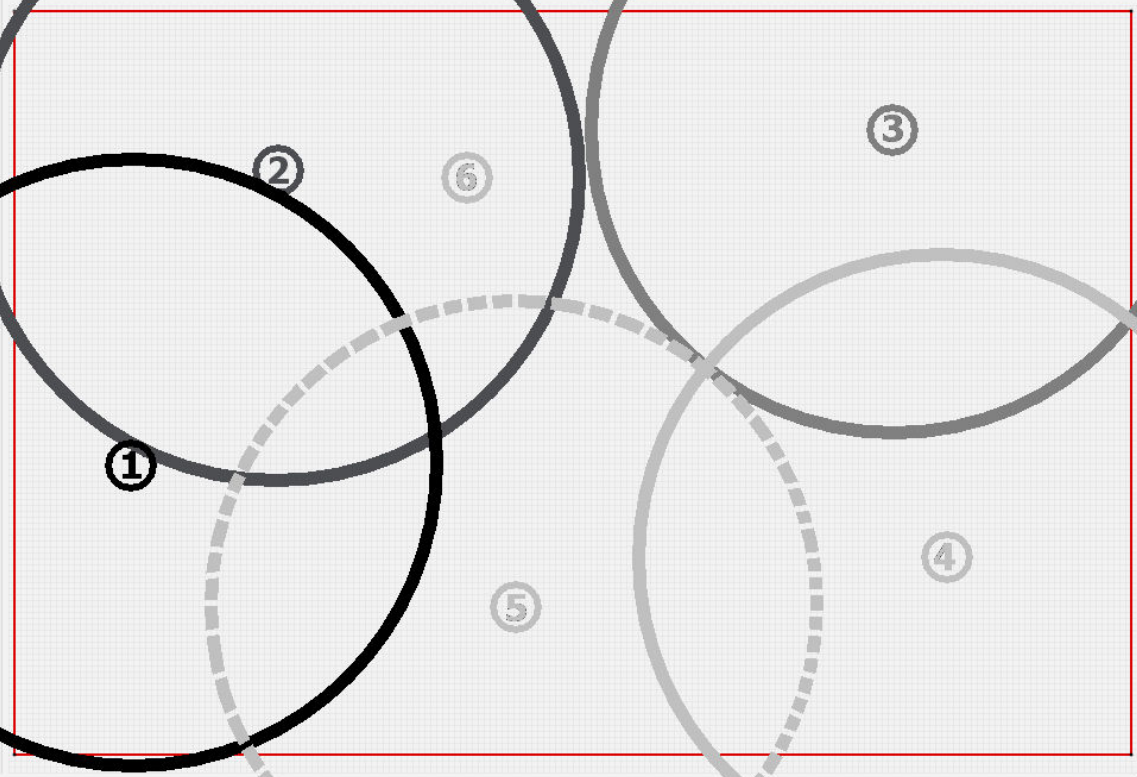

Drawing Tools

- Draw Walls
- Access Points
- Activities
- Eraser

Wall Tools

**Material**

- Brick
- Layered Drywall
- Concrete
- Glass
- Wood
- Metal
- gdb

**Thickness**

- Th...
- Th...

**Snaps**

- Grid
- Walls

Stop drawing
